# Supplementary material for: The Association of Cholesterol Uptake and Synthesis with Histology and Genotype in Cortisol-Producing Adenoma (CPA)
Source: Int J Mol Sci. 2022 Feb 16;23(4):2174. doi: 10.3390/ijms23042174 (PMC8875534; doi:10.3390/ijms23042174)
Supplement: Supplementary file 1 [file ijms-23-02174-s001.zip › ijms-1560439-supplementary.pdf]

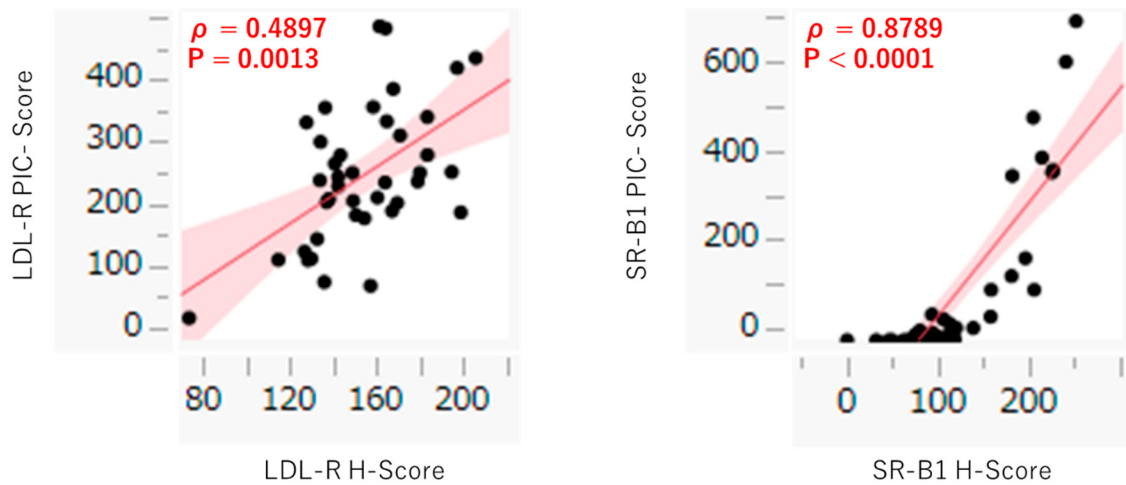

**Supplemental Figure S1. Correlations between the immunoreactivity of receptors in the cytoplasm and membrane.** The correlations of immunoreactivity of LDL-R or SR-B1 in the cytoplasm and membrane were examined, respectively. Both of them showed significant positive correlations.

**Supplemental Table S1. Protocols of IHC.** Detailed IHC protocols of LDL-R, SR-B1, ACAT1, ACAT2, HSL and DHCR24.

| Antibody | Species | Clone      | Antigen retrieval treatment | Dilution ratio | Kit           |
|----------|---------|------------|-----------------------------|----------------|---------------|
| LDL-R    | Rabbit  | Monoclonal | AC (pH high)                | 1:1000         | envision FLEX |
| SR-B1    | Rabbit  | Monoclonal | AC (pH high)                | 1:1000         | Nichirei      |
| ACAT1    | Rabbit  | Monoclonal | AC (pH=9)                   | 1:100          | Nichirei      |
| ACAT2    | Mouse   | Monoclonal | AC                          | 1:100          | Envision +    |
| HSL      | Mouse   | Monoclonal | AC                          | 1:100          | Nichirei      |
| DHCR24   | Rabbit  | Monoclonal | None                        | 1:500          | Nichirei      |

Abbreviation; AC (autoclave)
